# Supplementary material for: Clinical Research in Chronic Lymphocytic Leukemia in Pakistan; A Systematic Review
Source: MDPI journal article supplement (doi:10.3390/medicina59081483), 2023-08-17
Supplement: s1 [file s1]

## Supplemental Index S1

| Database | Search Strategy                                                                                                                                                                                                                                                                                                                                                                                                                                                                                                                                                                                                                                                                                                                                                                                                                                                                                                                                                                                                                                                                                                                              | Articles |
|----------|----------------------------------------------------------------------------------------------------------------------------------------------------------------------------------------------------------------------------------------------------------------------------------------------------------------------------------------------------------------------------------------------------------------------------------------------------------------------------------------------------------------------------------------------------------------------------------------------------------------------------------------------------------------------------------------------------------------------------------------------------------------------------------------------------------------------------------------------------------------------------------------------------------------------------------------------------------------------------------------------------------------------------------------------------------------------------------------------------------------------------------------------|----------|
| PubMed   | (Lymphoma,<br>Lymphoplasmacytoid, CLL<br>OR Lymphoma, Small-Cell<br>OR Lymphoma, Small Cell<br>OR Lymphomas, Small-Cell<br>OR Lymphoplasmacytoid<br>Lymphoma, CLL OR CLL<br>Lymphoplasmacytoid<br>Lymphomas OR Lymphoma,<br>CLL Lymphoplasmacytoid<br>OR Small-Cell Lymphoma<br>OR Small Cell Lymphoma<br>OR Lymphoblastic<br>Leukemia, Chronic OR<br>Chronic Lymphoblastic<br>Leukemias OR Lymphocytic<br>Leukemia, Chronic OR<br>Chronic Lymphocytic<br>Leukemias OR Lymphocytic<br>Leukemia, Chronic, B Cell<br>OR Lymphocytic Leukemia,<br>Chronic, B-Cell OR<br>Lymphocytic Lymphoma OR<br>Lymphocytic Lymphomas<br>OR Lymphocytic Lymphoma,<br>OR B Cell Chronic<br>Lymphocytic Leukemia OR<br>B-Lymphocytic Leukemia,<br>Chronic OR B Lymphocytic<br>Leukemia, Chronic OR B-<br>Lymphocytic Leukemias,<br>Chronic OR Chronic B-<br>Lymphocytic Leukemia OR<br>Chronic B-Lymphocytic<br>Leukemias OR Chronic<br>Lymphocytic Leukemia OR<br>Leukemia, B Cell, Chronic<br>OR Leukemia, B-Cell,<br>Chronic OR Chronic<br>Lymphatic Leukemia OR<br>Chronic Lymphatic<br>Leukemias OR Leukemias,<br>Chronic Lymphatic OR<br>Lymphoma, Small | 69       |

|                    |                                                                                                                                                                                                                                                                    |    |
|--------------------|--------------------------------------------------------------------------------------------------------------------------------------------------------------------------------------------------------------------------------------------------------------------|----|
|                    | Lymphocytic OR<br>Lymphocytic Lymphoma,<br>Small OR Lymphomas, Small<br>Lymphocytic OR Small<br>Lymphocytic Lymphoma OR<br>Small Lymphocytic<br>Lymphomas OR Lymphoma,<br>Small Lymphocytic,<br>Plasmacytoid) AND<br>(Pakistan OR Islamic<br>Republic of Pakistan) |    |
| Google Scholar     | Chronic lymphocytic<br>leukemia; Pakistan                                                                                                                                                                                                                          | 94 |
| Clinicaltrials.gov | Conditions or disease:<br>Chronic lymphocytic<br>leukemia<br>Country: Pakistan                                                                                                                                                                                     | 0  |

Date when search performed: January 14<sup>th</sup>, 2022

Place of search: Rochester, New York, United States
